# Supplementary material
Source: publisher figshare collection journal article supplement (https://frontiersin.figshare.com/ndownloader/files/12738161)
Supplement: Supplementary file [file 12738161]

**A) Col-0 rosette growth during hormonal treatment**

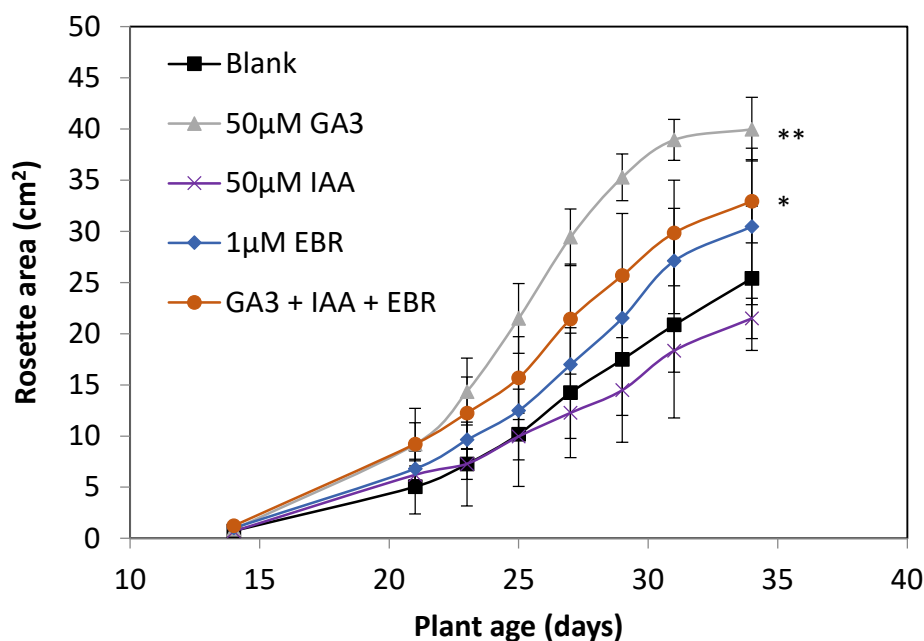

**B) Photos of 25-day-old plants**

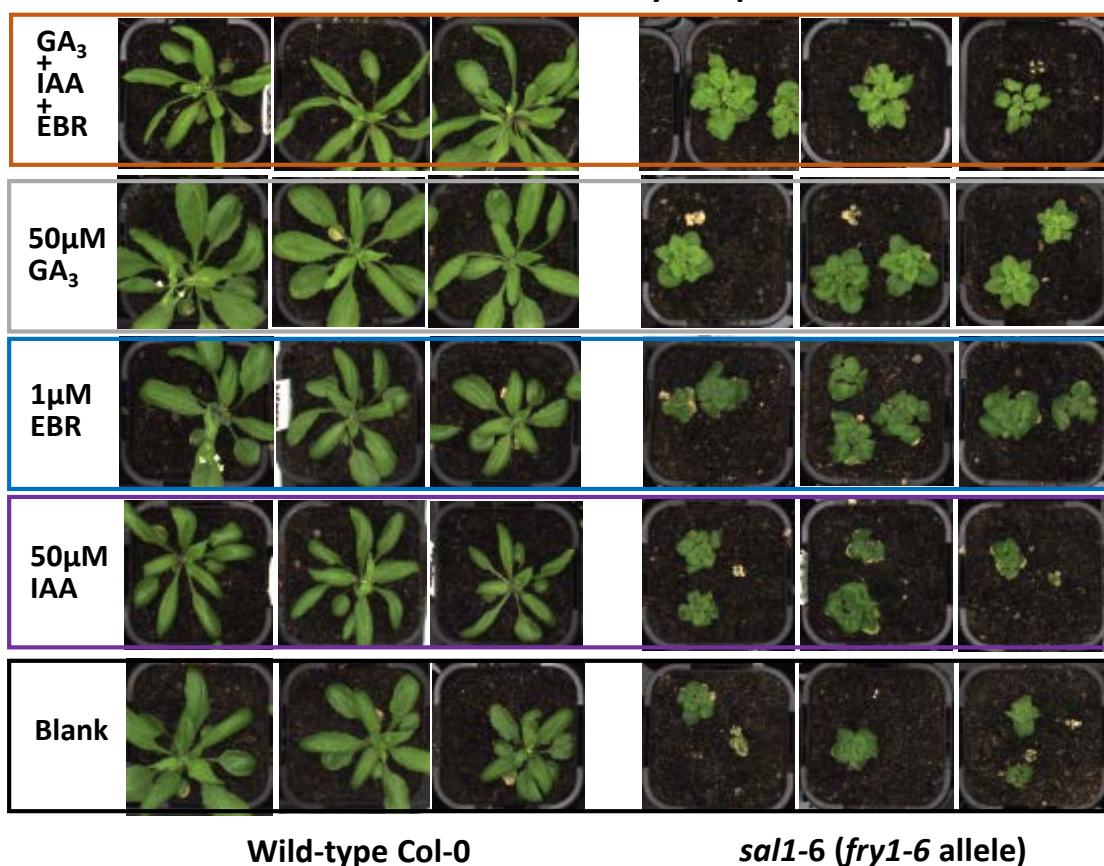

**Supplementary Figure 1: Rosette growth under different hormonal treatment. A)** Soil grown Col-0 were sprayed with different hormones [50 µM of GA<sub>3</sub>, 50 µM of IAA, or 1 µM of EBR individually, or all of the three hormones together] or blank control [containing 0.5% (v/v) ethanol, which was used to dissolve the commercially available hormones, and 0.1% (v/v) Tween-20] from two weeks old onwards (three times per week). The rosette growth since treatment were quantified via LemnaTec Scanalyzer until bolting stage based on rosette area [full method see Phua et al. (2018)]. Average rosette area ± SD of seven plants per treatment are shown. Significant differences from blank treatment at 34 days old (ANOVA - Dunnett test [GraphPad InStat]) are indicated by \*\* for p<0.01 and \* for p<0.05. **B)** Example photos of wild-type Col-0 and *sal1* plants at 25 days old (after 10 days of hormonal treatment).
